# Supplementary material for: Ultrathin amorphous iron-doped cobalt-molybdenum hydroxide nanosheets for advanced oxygen evolution reactions
Source: Royal Society of Chemistry journal article supplement (doi:10.1039/d0nr08408e), 2021-01-01
Supplement: d0nr08408e1.pdf [file d0nr08408e1.pdf]

Electronic Supplementary Material (ESI) for Nanoscale.  
This journal is © The Royal Society of Chemistry 2020

## Supporting Information

### Ultrathin Amorphous Iron-doped Cobalt-Molybdenum Hydroxide

### Nanosheets for Advanced Oxygen Evolution Reaction

Lingjian Zeng,<sup>a</sup> Binbin Cao,<sup>a</sup> Xin Wang,<sup>c</sup> Haidong Liu,<sup>a</sup> Jingrui Shang,<sup>a</sup> Jianping Lang,<sup>\*b</sup> Xueqin Cao<sup>\*a</sup> and Hongwei Gu<sup>\*a</sup>

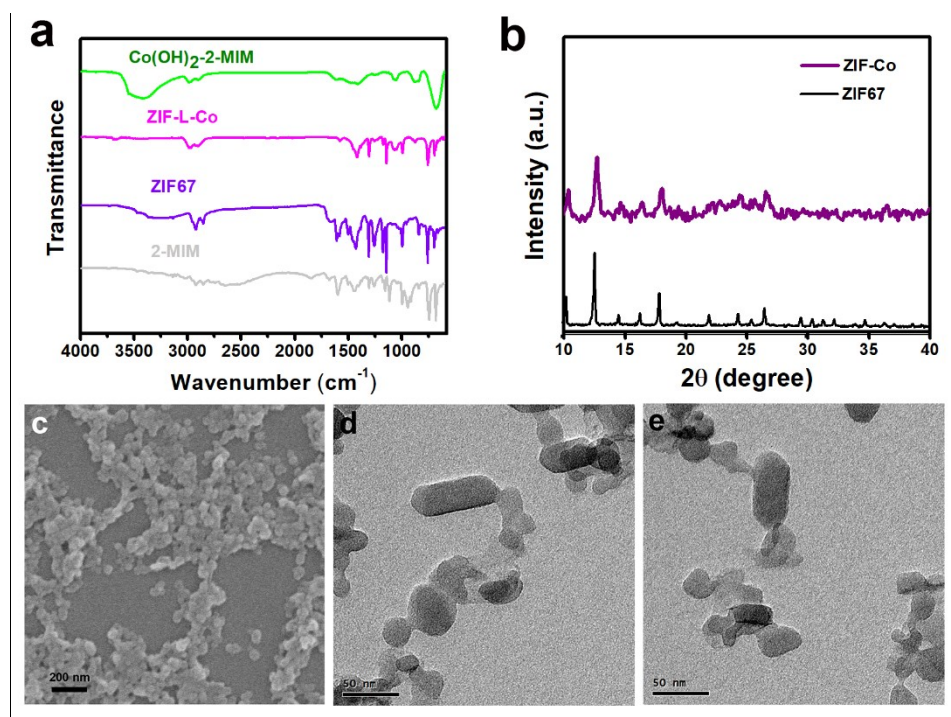

**Figure S1.** (a) FT-IR spectra of Co UH, ZIF-L-Co, ZIF67 and 2-MIM, (b) XRD pattern of ZIF-L-Co and ZIF67, (c) SEM and (d, e) TEM images of ZIF-L-Co.

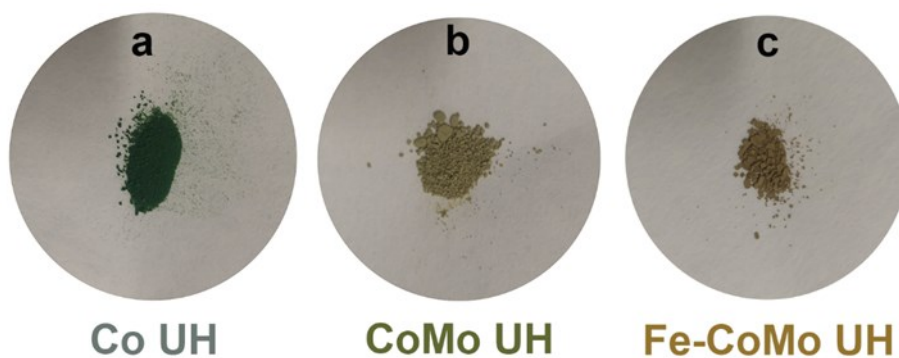

**Figure S2.** Photographs of (a) Co UH, (b) CoMo UH, and (c) Fe-CoMo UH powders.

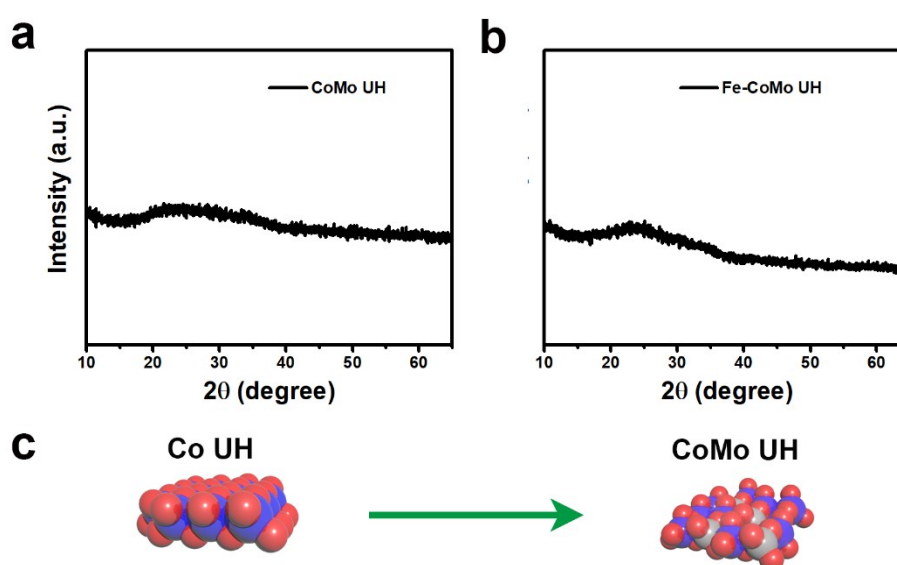

**Figure S3.** XRD pattern of (a) CoMo UH nanosheets and (b) Fe-CoMo UH nanosheets. (c) The schematic illustration of the structure of Co UH and CoMo UH nanosheets. Red, blue, and grey atoms are O, Co and Mo atoms, respectively.

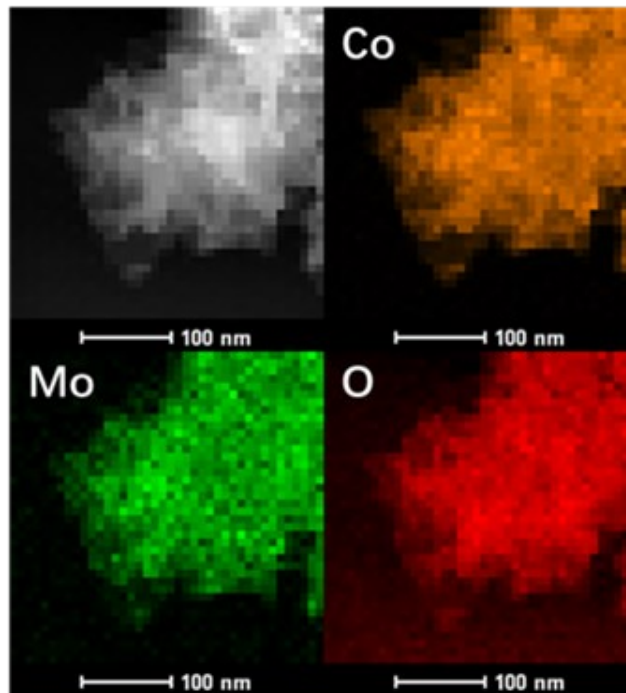

**Figure S4.** Element mapping images of CoMo UH nanosheets of Co, Mo, O.

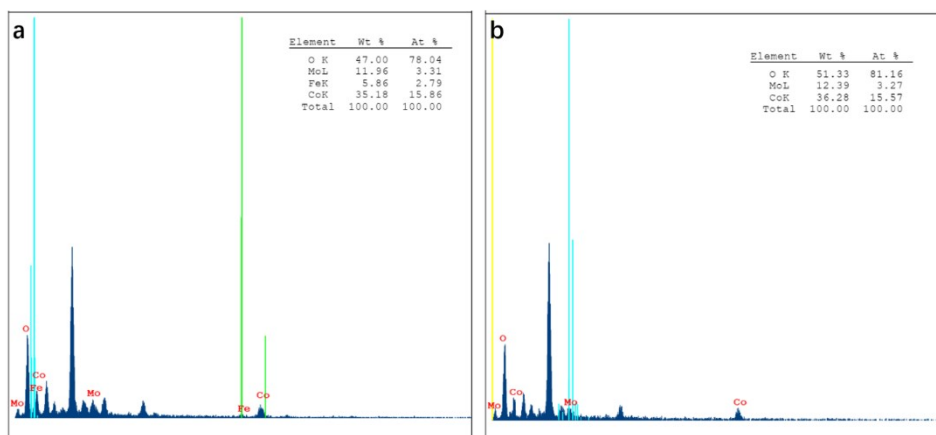

**Figure S5.** (a, b) EDS spectrum of Fe-CoMo nanosheets and CoMo UH nanosheets.

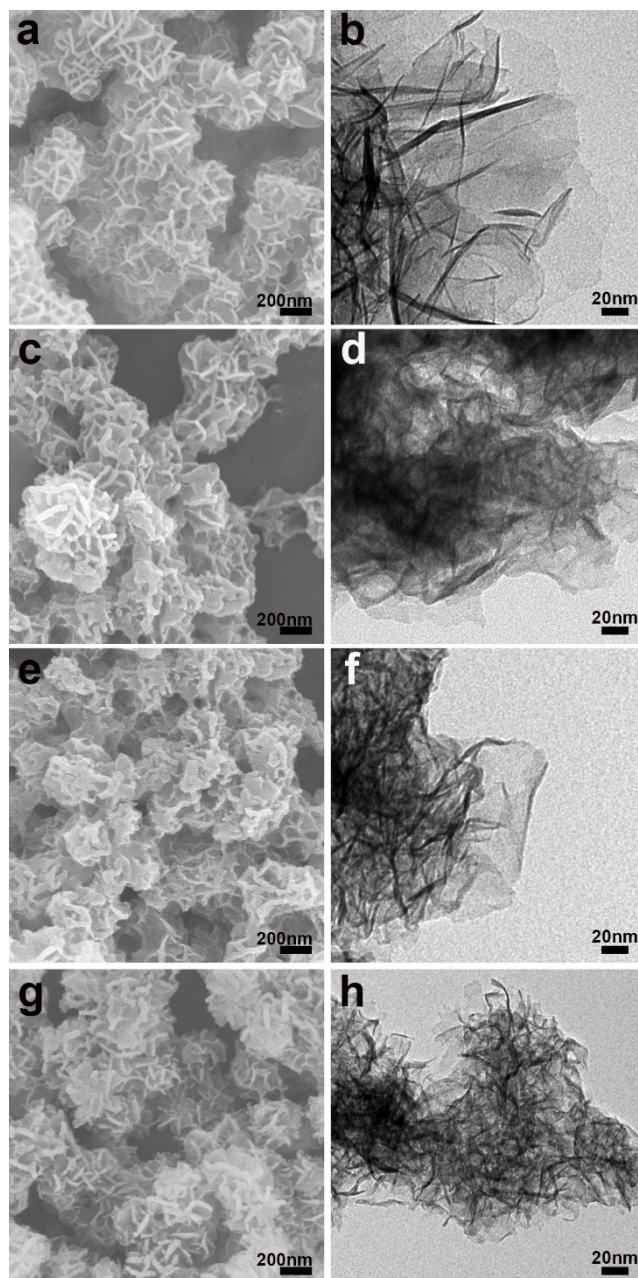

**Figure S6.** SEM and TEM images of CoMo1 (a, b), CoMo3 (c, d), CoMo4 (e, f), CoMo5 (g, h).

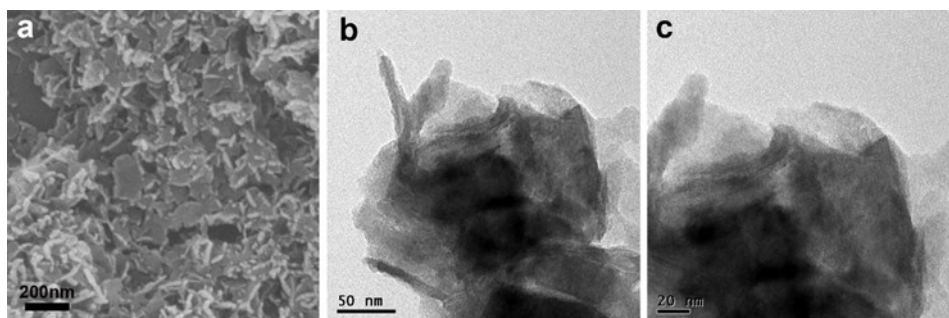

**Figure S7.** (a) SEM and (b, c) TEM images of Fe-Co UH.

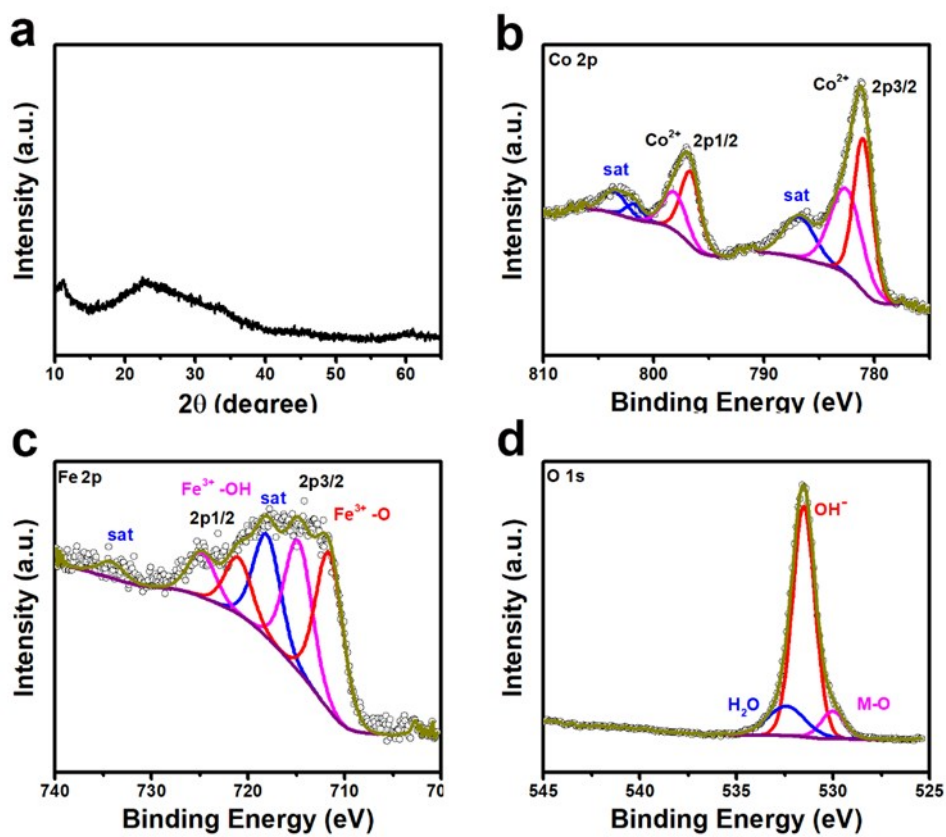

**Figure S8.** (a) XRD pattern and (b-d) XPS spectra of Fe-Co UH.



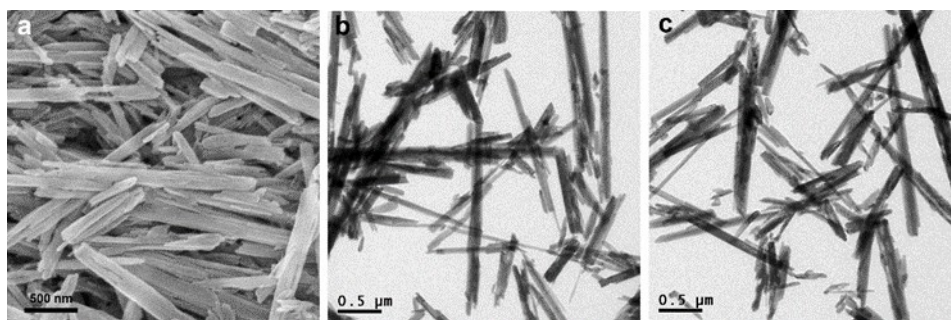

**Figure S9.** (a) SEM and (b, c) TEM images of  $\text{CoMoO}_4$ .

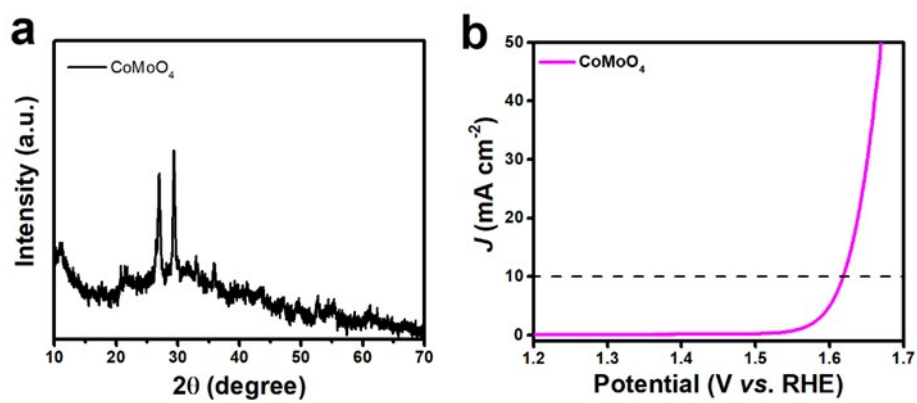

**Figure S10.** (a) XRD pattern and (b) polarization curve for OER of  $\text{CoMoO}_4$ .

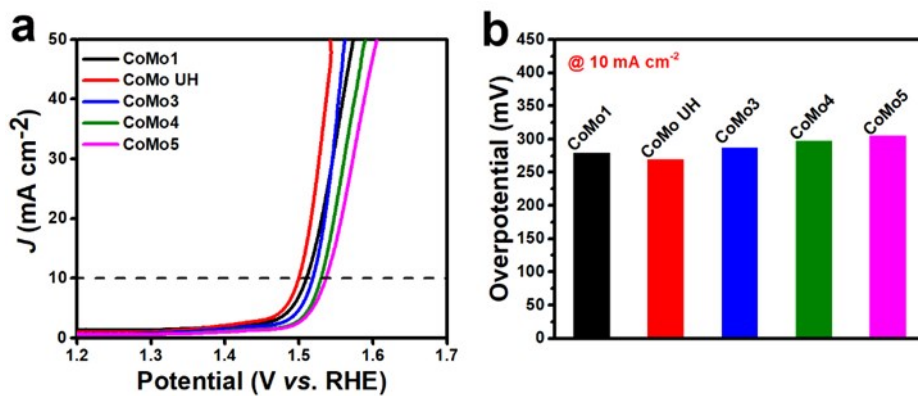

**Figure S11.** (a) Polarization curve for OER of CoMo1, CoMo UH, CoMo3, CoMo4, CoMo5 and (b) their overpotential comparison at  $10 \text{ mA cm}^{-2}$ .

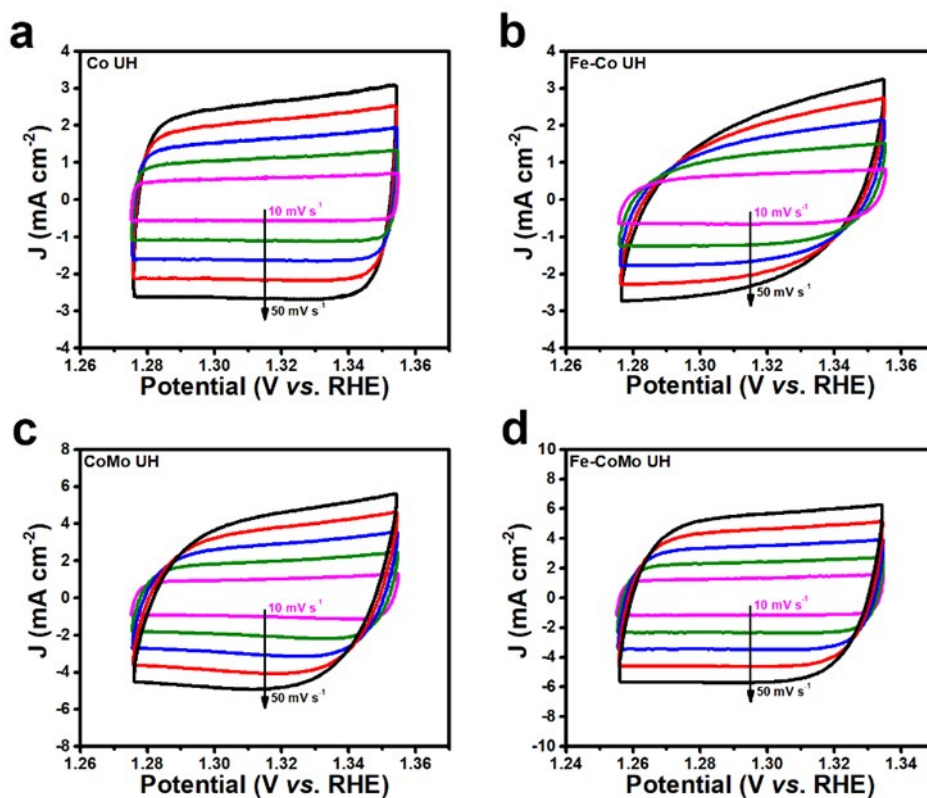

**Figure S12.** CV curves of (a) Co UH, (b) Fe-Co UH, (c) CoMo UH and (d) Fe-CoMo UH nanosheets with different scan rates from 10 to  $50 \text{ mV s}^{-1}$ .

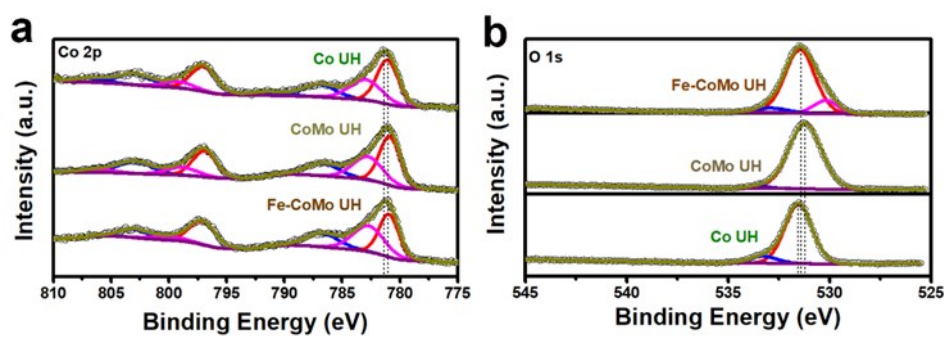

**Figure S13.** (a) Co 2p XPS and (b) O 1s XPS comparison between Fe-CoMo UH and CoMo UH and Co UH nanosheets.

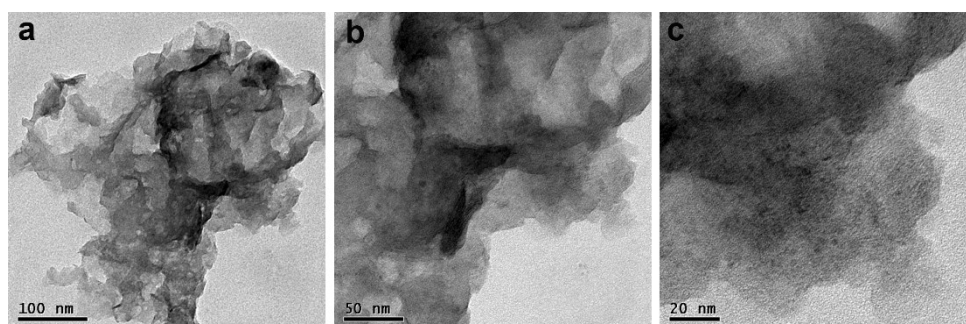

**Figure S14.** TEM images of Fe-CoMo UH nanosheets after long-time chronopotentiometry.



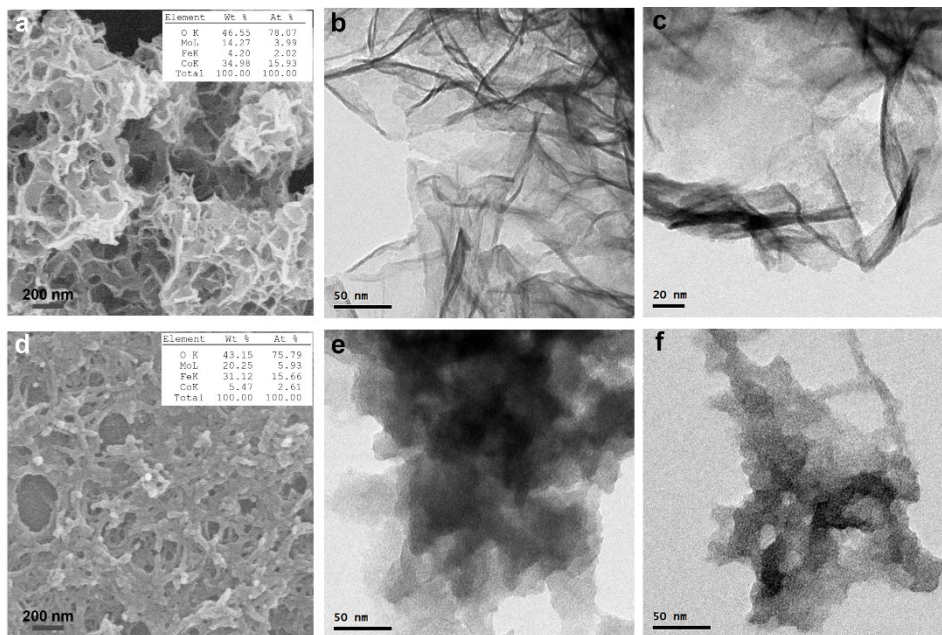

**Figure S15.** SEM and TEM images of Fe-CoMo1 (a-c) and Fe-CoMo3 (d-f). The inset in (a) and (d) shows the EDS of Fe-CoMo1 and Fe-CoMo3 in solution

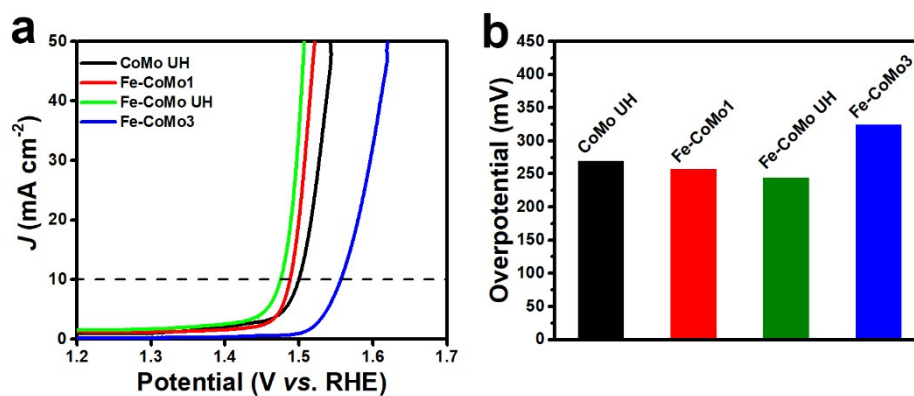

**Figure S16.** (a) Polarization curve for OER of CoMo UH, Fe-CoMo1, Fe-CoMo UH, Fe-CoMo3 and (b) their overpotential comparison at 10 mA cm<sup>-2</sup>.

**Table S1** Atomic ratio of Co/Mo/Fe from ICP-AES analysis on Fe-CoMo nanosheets and CoMo UH nanosheets.

| <b>The element in Fe-CoMo UH</b> | <b>Co</b> | <b>Mo</b> | <b>Fe</b> |
|----------------------------------|-----------|-----------|-----------|
| <b>Atomic ratio (%)</b>          | 70.56     | 18.72     | 10.71     |

  

| <b>The element in Fe-CoMo UH</b> | <b>Co</b> | <b>Mo</b> |
|----------------------------------|-----------|-----------|
| <b>Atomic ratio (%)</b>          | 82.37     | 17.63     |

**Table S2** Atomic ratio of Co/Mo from ICP-AES analysis on amorphous CoMo samples with different ratios of Co/Mo.

| <b>Samples</b>                    | <b>Co (at%)</b> | <b>Mo (at%)</b> |
|-----------------------------------|-----------------|-----------------|
| <b>CoMo1</b>                      | 91.64           | 8.36            |
| <b>CoMo2 (CoMo UH Nanosheets)</b> | 82.37           | 17.63           |
| <b>CoMo3</b>                      | 74.61           | 25.39           |
| <b>CoMo4</b>                      | 72.11           | 27.89           |
| <b>CoMo5</b>                      | 68.58           | 31.42           |

**Table S3.** Comparison of the OER performance of Fe-CoMo UH nanosheets with previously reported OER electrocatalysts

| Catalyst                                                   | $\eta(10 \text{ mA cm}^{-2})$<br>(mV) | Tafel slope<br>(mV dec <sup>-1</sup> ) | Electrolyte      | Reference        |
|------------------------------------------------------------|---------------------------------------|----------------------------------------|------------------|------------------|
| <b>Fe-CoMo UH</b>                                          | <b>245</b>                            | <b>37</b>                              | <b>1.0 M KOH</b> | <b>This work</b> |
| AH-Co                                                      | 280                                   | 40                                     | 1.0 M KOH        | 1                |
| CoOOH/Co <sub>x</sub> V <sub>1-x</sub>                     | 282                                   | 56                                     | 1.0 M KOH        | 2                |
| Ag-doped CoOOH                                             | 340                                   | 65                                     | 1.0 M KOH        | 3                |
| Fe-Co-O NSs                                                | 260                                   | 53                                     | 1.0 M KOH        | 4                |
| FeCo <sub>0.5</sub> Ni <sub>0.5</sub> -LDH                 | 248                                   | 38                                     | 1.0 M KOH        | 5                |
| Cr-CoFe LDHs/NF                                            | 238                                   | 107                                    | 1.0 M KOH        | 6                |
| Mn <sub>2</sub> O <sub>3</sub> :2.64%Mo                    | 570                                   | 75                                     | 1.0 M KOH        | 7                |
| Meso-Fe-MoS <sub>2</sub> /CoMo <sub>2</sub> S <sub>4</sub> | 290                                   | 65                                     | 1.0 M KOH        | 8                |
| Fe-CoO <sub>x</sub> Vo-sS                                  | 260                                   | 21                                     | 1.0 M KOH        | 9                |
| NiFe-NS                                                    | 300                                   | 40                                     | 1.0 M KOH        | 10               |
| CoCrRu LDSs                                                | 290                                   | 56                                     | 0.1 M KOH        | 11               |
| Co(OH) <sub>2</sub> @NCNTs@NF                              | 270                                   | 72                                     | 1.0 M KOH        | 12               |

## Reference

1. J. Liu, J. Nai, T. You, P. An, J. Zhang, G. Ma, X. Niu, C. Liang, S. Yang and L. Guo, *Small*, 2018, **14**, 1703514.
2. K. Fan, H. Zou, L. Duan and L. Sun, *Advanced Energy Materials*, 2019, **10**, 1903571.
3. C. Lee, K. Shin, C. Jung, P.-P. Choi, G. Henkelman and H. M. Lee, *ACS Catalysis*, 2019, **10**, 562-569.
4. Q. Wang, X. Xue, Y. Lei, Y. Wang, Y. Feng, X. Xiong, D. Wang and Y. Li, *Small*, 2020, **16**, 2001571.
5. W.-D. Zhang, H. Yu, T. Li, Q.-T. Hu, Y. Gong, D.-Y. Zhang, Y. Liu, Q.-T. Fu, H.-Y. Zhu, X. Yan and Z.-G. Gu, *Applied Catalysis B: Environmental*, 2020, **264**, 118532.
6. L. Wen, X. Zhang, J. Liu, X. Li, C. Xing, X. Lyu, W. Cai, W. Wang and Y. Li, *Small*, 2019, **15**, 1902373.
7. S. E. Balaghi, C. A. Triana and G. R. Patzke, *ACS Catalysis*, 2020, **10**, 2074-2087.
8. Y. Guo, J. Tang, J. Henzie, B. Jiang, W. Xia, T. Chen, Y. Bando, Y. M. Kang, M. S. A. Hossain, Y. Sugahara and Y. Yamauchi, *ACS Nano*, 2020, **14**, 4141-4152.
9. L. Zhuang, Y. Jia, H. Liu, Z. Li, M. Li, L. Zhang, X. Wang, D. Yang, Z. Zhu and X. Yao, *Angew. Chem. Int. Ed. Engl.*, 2020, DOI: 10.1002/anie.202006546.
10. F. Song and X. Hu, *Nat Commun*, 2014, **5**, 4477.
11. C. Dong, X. Zhang, Weichao Wang and F. Huang\*, *small*, 2020, **16**, 1905328.
12. P. Guo, J. Wu, X.-B. Li, J. Luo, W.-M. Lau, H. Liu, X.-L. Sun and L.-M. Liu, *Nano Energy*, 2018, **47**, 96-104.
